# Supplementary material for: Radiomic Features of Acute Cerebral Hemorrhage on Non-Contrast CT Associated with Patient Survival
Source: MDPI journal article supplement (doi:10.3390/diagnostics14090944), 2024-04-30
Supplement: s1 [file s1]

**Supplementary Table S1.** List of original radiomic features

| Feature Family                                           |    | Feature name                   |
|----------------------------------------------------------|----|--------------------------------|
| First-order                                              | 1  | 10th percentile                |
|                                                          | 2  | 90th percentile                |
|                                                          | 3  | Energy                         |
|                                                          | 4  | Entropy                        |
|                                                          | 5  | Interquartile Range            |
|                                                          | 6  | Kurtosis                       |
|                                                          | 7  | Maximum                        |
|                                                          | 8  | Mean                           |
|                                                          | 9  | Mean Absolute Deviation        |
|                                                          | 10 | Median                         |
|                                                          | 11 | Minimum                        |
|                                                          | 12 | Range                          |
|                                                          | 13 | Robust Mean Absolute Deviation |
|                                                          | 14 | Root Mean Squared              |
|                                                          | 15 | Skewness                       |
|                                                          | 16 | Total Energy                   |
|                                                          | 17 | Uniformity                     |
|                                                          | 18 | Variance                       |
| Shape                                                    | 1  | Elongation                     |
|                                                          | 2  | Flatness                       |
|                                                          | 3  | Least Axis Length              |
|                                                          | 4  | Major Axis Length              |
|                                                          | 5  | Maximum 2D Diameter Column     |
|                                                          | 6  | Maximum 2D Diameter Row        |
|                                                          | 7  | Maximum 2D Diameter Slice      |
|                                                          | 8  | Maximum 3D Diameter            |
|                                                          | 9  | Mesh Volume                    |
|                                                          | 10 | Minor Axis Length              |
|                                                          | 11 | Sphericity                     |
|                                                          | 12 | Surface Area                   |
|                                                          | 13 | Surface Area to Volume Ratio   |
|                                                          | 14 | Voxel Volume                   |
| Texture - Gray Level Cooccurrence Matrix Features (glcm) | 1  | Autocorrelation                |
|                                                          | 2  | Cluster Prominence             |
|                                                          | 3  | Cluster Shade                  |
|                                                          | 4  | Cluster Tendency               |
|                                                          | 5  | Contrast                       |

|                                                                |    |                                        |
|----------------------------------------------------------------|----|----------------------------------------|
|                                                                | 6  | Correlation                            |
|                                                                | 7  | Difference Average                     |
|                                                                | 8  | Difference Entropy                     |
|                                                                | 9  | Difference Variance                    |
|                                                                | 10 | Informational Measure of Correlation 1 |
|                                                                | 11 | Informational Measure of Correlation 2 |
|                                                                | 12 | Inverse Difference                     |
|                                                                | 13 | Inverse Difference Moment              |
|                                                                | 14 | Inverse Difference Moment Normalized   |
|                                                                | 15 | Inverse Difference Normalized          |
|                                                                | 16 | Inverse Variance                       |
|                                                                | 17 | Joint Average                          |
|                                                                | 18 | Joint Energy                           |
|                                                                | 19 | Joint Entropy                          |
|                                                                | 20 | Maximal Correlation Coefficient        |
|                                                                | 21 | Maximum Probability                    |
|                                                                | 22 | Sum Average                            |
|                                                                | 23 | Sum Entropy                            |
|                                                                | 24 | Sum of Squares                         |
| <b>Texture - Gray Level Size Zone Matrix Features (glszm)</b>  | 1  | Gray Level Non-Uniformity              |
|                                                                | 2  | Gray Level Non-Uniformity Normalized   |
|                                                                | 3  | Gray Level Variance                    |
|                                                                | 4  | High Gray Level Zone Emphasis          |
|                                                                | 5  | Large Area Emphasis                    |
|                                                                | 6  | Large Area High Gray Level Emphasis    |
|                                                                | 7  | Large Area Low Gray Level Emphasis     |
|                                                                | 8  | Low Gray Level Zone Emphasis           |
|                                                                | 9  | Size Zone Non-Uniformity               |
|                                                                | 10 | Size Zone Non-Uniformity Normalized    |
|                                                                | 11 | Small Area Emphasis                    |
|                                                                | 12 | Small Area High Gray Level Emphasis    |
|                                                                | 13 | Small Area Low Gray Level Emphasis     |
|                                                                | 14 | Zone Entropy                           |
|                                                                | 15 | Zone Percentage                        |
|                                                                | 16 | Zone Variance                          |
| <b>Texture - Gray Level Run Length Matrix Features (glrlm)</b> | 1  | Gray Level Non-Uniformity              |
|                                                                | 2  | Gray Level Non-Uniformity Normalized   |
|                                                                | 3  | Gray Level Variance                    |
|                                                                | 4  | High Gray Level Run Emphasis           |

|                                                                           |    |                                           |
|---------------------------------------------------------------------------|----|-------------------------------------------|
|                                                                           | 5  | Long Run Emphasis                         |
|                                                                           | 6  | Long Run High Gray Level Emphasis         |
|                                                                           | 7  | Long Run Low Gray Level Emphasis          |
|                                                                           | 8  | Low Gray Level Run Emphasis               |
|                                                                           | 9  | Run Entropy                               |
|                                                                           | 10 | Run Length Non-Uniformity                 |
|                                                                           | 11 | Run Length Non-Uniformity Normalized      |
|                                                                           | 12 | Run Percentage                            |
|                                                                           | 13 | Run Variance                              |
|                                                                           | 14 | Short Run Emphasis                        |
|                                                                           | 15 | Short Run High Gray Level Emphasis        |
|                                                                           | 16 | Short Run Low Gray Level Emphasis         |
| <b>Texture - Neighboring Gray Tone Difference Matrix Features (ngtdm)</b> | 1  | Busyness                                  |
|                                                                           | 2  | Coarseness                                |
|                                                                           | 3  | Complexity                                |
|                                                                           | 4  | Contrast                                  |
|                                                                           | 5  | Strength                                  |
| <b>Texture - Gray Level Dependence Matrix Features (gldm)</b>             | 1  | Dependence Entropy                        |
|                                                                           | 2  | Dependence Non-Uniformity                 |
|                                                                           | 3  | Dependence Non-Uniformity Normalized      |
|                                                                           | 4  | Dependence Variance                       |
|                                                                           | 5  | Gray Level Non-Uniformity                 |
|                                                                           | 6  | Gray Level Variance                       |
|                                                                           | 7  | High Gray Level Emphasis                  |
|                                                                           | 8  | Large Dependence Emphasis                 |
|                                                                           | 9  | Large Dependence High Gray Level Emphasis |
|                                                                           | 10 | Large Dependence Low Gray Level Emphasis  |
|                                                                           | 11 | Low Gray Level Emphasis                   |
|                                                                           | 12 | Small Dependence Emphasis                 |
|                                                                           | 13 | Small Dependence High Gray Level Emphasis |
|                                                                           | 14 | Small Dependence Low Gray Level Emphasis  |

Adapted from Haider SP, et al. (Front Neurosci.;17:1225342)

**Supplementary Table S2.** The baseline demographics, clinical findings, and laboratory results as well as interventions during the admission categorized between discovery versus validation cohorts.

|                                                       | Discovery      | Validation     | P-value |
|-------------------------------------------------------|----------------|----------------|---------|
| Age (years)                                           | 61.82 ± 12.74  | 62.62 ± 13.26  | 0.395   |
| Sex (Male)                                            | 352 (60.7%)    | 189 (64.9%)    | 0.251   |
| Race: Black or African-American                       | 69 (11.9%)     | 42 (14.4%)     | 0.342   |
| Race: White                                           | 176 (30.3%)    | 62 (21.3%)     | 0.006   |
| Race: Other                                           | 2 (0.34%)      | 2 (0.69%)      | 0.862   |
| Race: Unknown / Not reported                          | 2 (0.34%)      | 6 (2.06%)      | 0.033   |
| Race: Asian                                           | 330 (56.9%)    | 178 (61.1%)    | 0.257   |
| Race: American Indian or Alaska Native                | 1 (0.17%)      | 2 (0.69%)      | 0.542   |
| Systolic blood pressure (mm Hg)                       | 175.40 ± 24.65 | 174.66 ± 24.89 | 0.677   |
| Diastolic blood pressure (mm Hg)                      | 94.08 ± 19.90  | 94.65 ± 20.15  | 0.691   |
| NIH Stroke Scale score                                | 11.0 (10.0)    | 10.0 (10.0)    | 0.465   |
| Glasgow Coma Scale (GCS) score                        | 15.0 (2.0)     | 15.0 (2.0)     | 0.967   |
| Platelet count (x 10 <sup>3</sup> / mm <sup>3</sup> ) | 222.45 ± 60.30 | 219.51 ± 67.38 | 0.529   |
| Activated partial thromboplastin time (sec)           | 27.35 ± 6.00   | 27.81 ± 5.63   | 0.270   |
| International normalized ratio (INR)                  | 1.00 ± 0.17    | 0.99 ± 0.10    | 0.353   |
| Serum glucose (mg/dL)                                 | 138.80 ± 56.28 | 137.98 ± 52.02 | 0.830   |
| Intracerebral hemorrhage volume (mL)                  | 13.3 ± 12.3    | 13.9 ± 11.9    | 0.417   |
| Mechanical ventilation                                | 77 (13.4%)     | 30 (10.4%)     | 0.254   |
| External ventricular catheter                         | 44 (7.6%)      | 11 (3.8%)      | 0.043   |
| Surgical evacuation decompression                     | 27 (4.7%)      | 9 (3.1%)       | 0.364   |

The values are presented as mean ± standard deviation, median (interquartile), or frequency (per-centage), for continuous, ordinal, and categorical variables, respectively

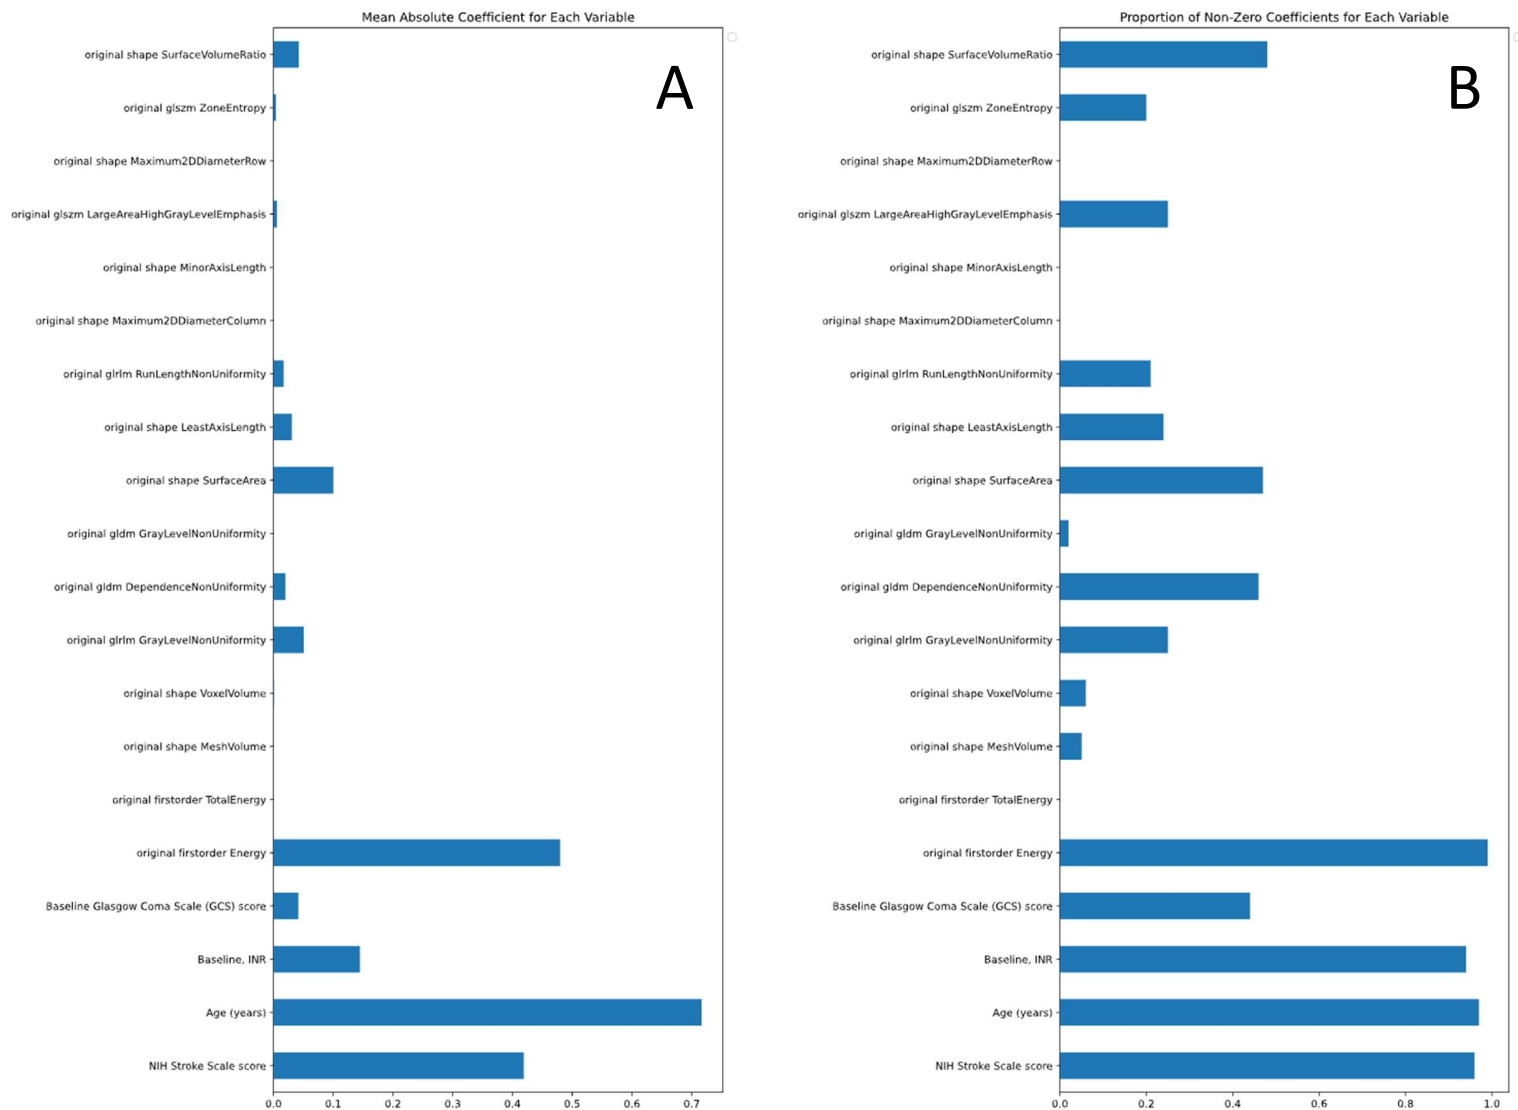

**Supplementary Figure S1.** A bar plot of the (A) mean absolute coefficients and (B) percent non-zero for each variable in the LASSO cox analysis. The Original first order Energy feature consistently demonstrates high mean absolute coefficients and proportion of non-zero coefficients across the model iterations, signifying its importance in the analysis.

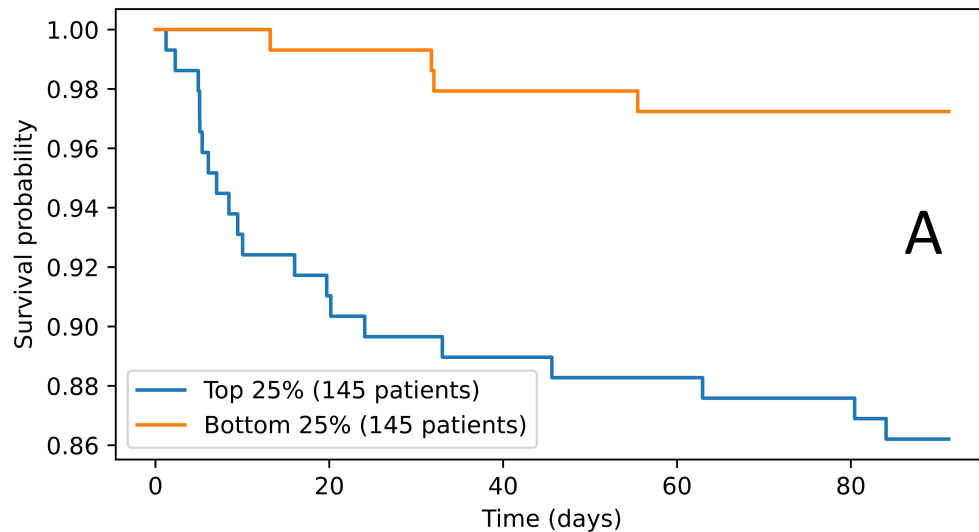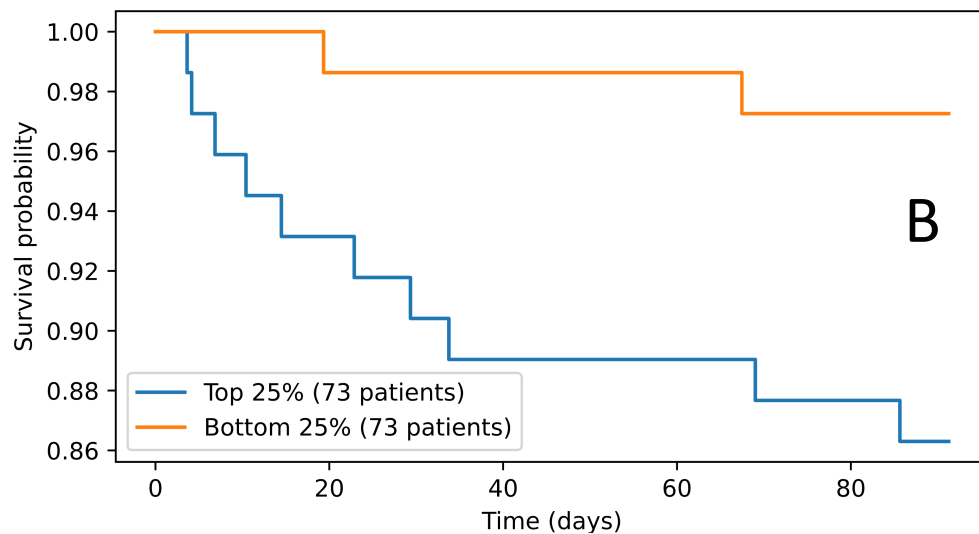

**Supplementary Figure S2.** Kaplan-Meier survival analysis of the ICH original first order Energy. (A) Survival outcomes associated with varying original first order Energy in the training dataset. Top quartile of patients (n = 145, blue) compared to the bottom quartile of patients (n = 145, orange). Log rank comparison p-value = 0.0006. (B) Survival outcomes associated with varying original first order Energy in the test dataset. Top quartile of patients (n = 73, blue) compared to the bottom quartile of patients (n = 73, orange). Log rank comparison p-value = 0.0157.
